# Supplementary material
Source: PubMed Central journal article supplement (PMC3058975)
Supplement: supp_M110.187583_jbc.M110.187583-1.pdf [file supp_M110.187583_jbc.M110.187583-1.pdf]

1 **Supplemental Table SI.** Data Collection and Refinement Statistics of Se-Met derivatized Cra protein, and  
 2 same with its effector F1P

3

| <b>Data collection</b>                 | <b>Se/Met Cra</b>    | <b>Cra/F1P</b>    |
|----------------------------------------|----------------------|-------------------|
| Space group                            | P2 <sub>1</sub>      | P2 <sub>1</sub>   |
| Wavelength                             | 0.97925 (peak)       | 0.933             |
| Cell dimensions                        |                      |                   |
| a, b, c (Å)                            | 37.3, 118.5,<br>61.8 | 37.7, 120.2, 61.8 |
| $\alpha$ , $\beta$ , $\gamma$ (°)      | 90, 107.1, 90        | 90, 107.4, 90     |
| Resolution (Å)                         | 59-2.0               | 60-2.3            |
| Highest resolution bin                 | 2.1-2.0              | 2.42-2.3          |
| No. of unique reflections              | 34595 (5011)         | 23340 (3381)      |
| Multiplicity                           | 7.4 (7.4)            | 3.4 (3.4)         |
| Completeness (%)                       | 99.8 (99.8)          | 99.8 (100)        |
| R <sub>sym</sub> or R <sub>merge</sub> | 8.3 (40)             | 5.0 (35.8)        |
| I / $\sigma$ (I)                       | 5.6 (1.7)            | 12.6 (2.2)        |
| B-factor Wilson (Å <sup>2</sup> )      | 28                   | 42                |
| <b>Refinement statistics</b>           |                      |                   |
| Resolution (Å)                         | 15.0-2.0             | 15.0-2.3          |
| R <sub>work</sub> / R <sub>free</sub>  | 18.4/21.8            | 18.4/22.1         |
| Reflections (R <sub>free</sub> )       | 66122 (3320)         | 22057 (1130)      |
| No. of atoms                           |                      |                   |
| Protein                                | 4193                 | 4186              |
| Ligand                                 | 12                   | 32                |
| Water                                  | 175                  | 107               |
| B-factors                              |                      |                   |
| Protein A/B                            | 41/40                | 50/51             |

---

|                                |                |                   |
|--------------------------------|----------------|-------------------|
| Ligand C/D                     | 37/58          | 30/34             |
| Water                          | 41             | 41                |
| R.m.s deviations               |                |                   |
| Bond lengths (Å)               | 0.003          | 0.003             |
| Bond angles (°)                | 0.71           | 0.843             |
| Ramachandran plot <sup>a</sup> | 91.7/7.9/0/0.4 | 87.9/11.5/0.2/0.4 |

---

1

2 \* Highest-resolution shell is shown in parentheses.

3 <sup>a</sup> Percentage of residues in most favored regions, allowed regions, generously allowed regions and  
4 disfavored regions, respectively.
