# Supplementary material
Source: PubMed Central journal article supplement (PMC3058975)
Supplement: supp_M110.187583_jbc.M110.187583-2.pdf [file supp_M110.187583_jbc.M110.187583-2.pdf]

1 **Supplemental Figure S1.** Expression and purification of the Cra protein of *Pseudomonas putida*

2

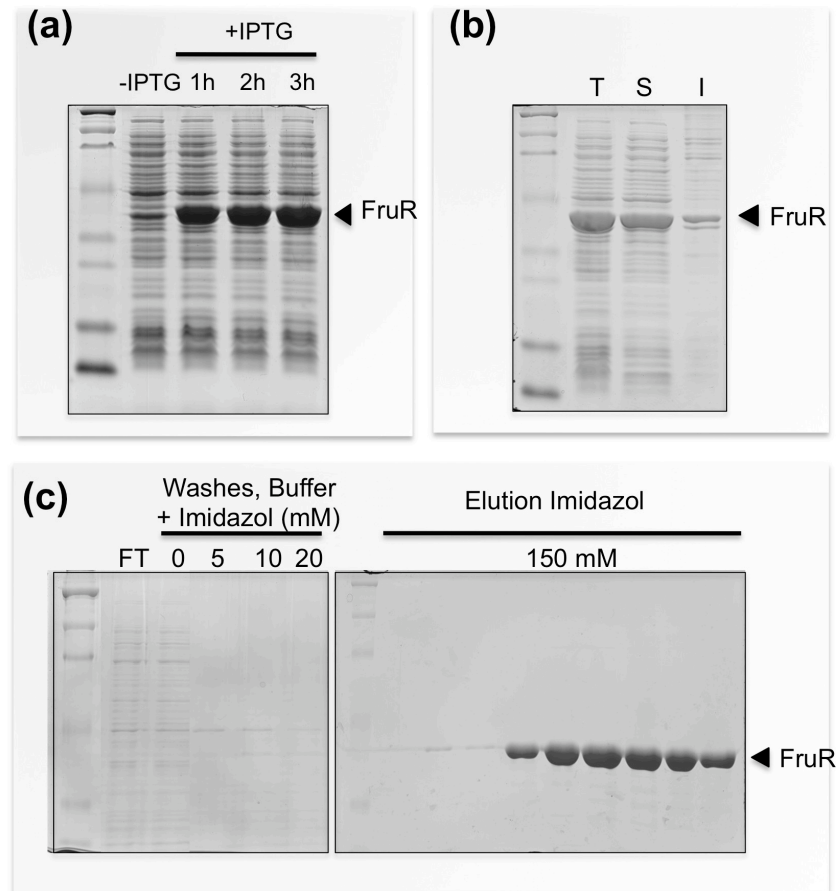

3

4 **(a) Expression test.** A high expression level of Cra from the expression vector (explained in the main text  
5 of the article) was triggered by addition of 0.5 mM isopropyl- $\beta$ -D-thiogalactoside (IPTG) followed by  
6 induction for a further 3 h. Cells were harvested by centrifugation and the cell pellets frozen at -80 °C. **(b)**  
7 **Solubility test.** Cell pellets were thawed, resuspended in 50 mM sodium phosphate buffer pH 7.0,  
8 200 mM NaCl (1 mL of culture OD<sub>600</sub> = 0.5 in 50  $\mu$ L) and mechanically lysed using a French press. Cell  
9 debris was removed by centrifugation (20,000 g for 30 min at 4 °C). Note that the majority of Cra protein  
10 remains in the soluble phase. **T** = total proteins (before lysis); **S** = soluble phase; **I** = insoluble phase (cell  
11 debris). **(c) Protein purification.** The native His<sub>6</sub>-Cra protein isolated from the lysis supernatant was  
12 purified using a TALON Metal Affinity Resin (Clontech). The resin was equilibrated with 20 bed volumes  
13 of 50 mM sodium phosphate buffer pH 7.0, 200 mM NaCl (equilibration buffer 1X). The clarified extract  
14 was passed through the column and then washed successively with 10 bed volumes of equilibration  
15 buffer 1X, 10 bed volumes of equilibration buffer 1X plus 5 mM of Imidazol, 10 bed volumes of

- 1 equilibration buffer 1X plus 10 mM of Imidazol and finally with 10 bed volumes of equilibration buffer 1X
- 2 plus 20 mM of Imidazol. The pure protein elution was done with equilibration buffer 1X plus 150 mM of
- 3 Imidazol. **FT** = Flow through.
