# Supplementary material
Source: PubMed Central journal article supplement (PMC3058975)
Supplement: supp_M110.187583_jbc.M110.187583-4.pdf [file supp_M110.187583_jbc.M110.187583-4.pdf]

1 Supplemental Figure S3. Organization of the fructose operon in bacteria

2

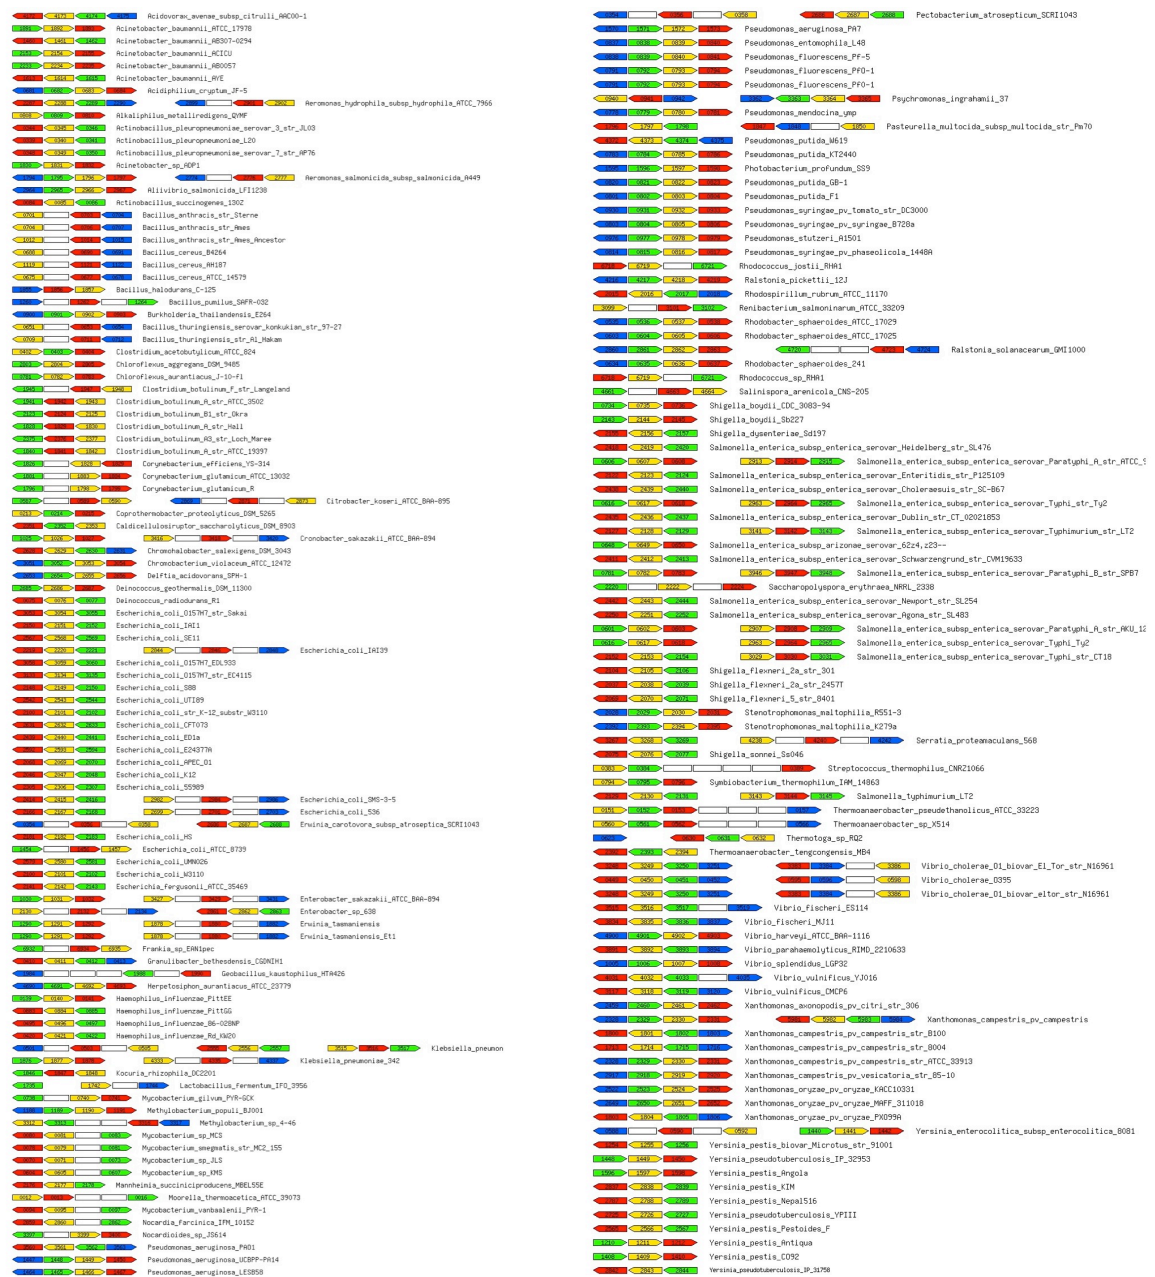

3

4

5 Genomic comparisons of the organization of the fructose operon reveal differences between species, e.g.  
6 position and orientation of the regulator *Cra* (*FruR*). Duplicate *fru* genes  
7 are not infrequent. Note similarities in the organization of the operon of *E. coli* and *S. typhimurium*, and  
8 their difference in respect to *Pseudomonas*. Color code: *fruB* in green, *fruA* in red, *fruK* in yellow and *cra*  
9 (*fruR*) in blue. Other genes found in or adjacent to the *fru* operon are shown as empty boxes.
