# Supplementary material
Source: PubMed Central journal article supplement (PMC3058975)
Supplement: supp_M110.187583_jbc.M110.187583-5.pdf [file supp_M110.187583_jbc.M110.187583-5.pdf]

1 **Supplemental Figure S4.** ITC assays of Cra protein with Glucose 6-phosphate (G6P), Fructose and  
2 Glucose.

3

4

5

6

7

8

9

10

11

12

13

14

15

16

17

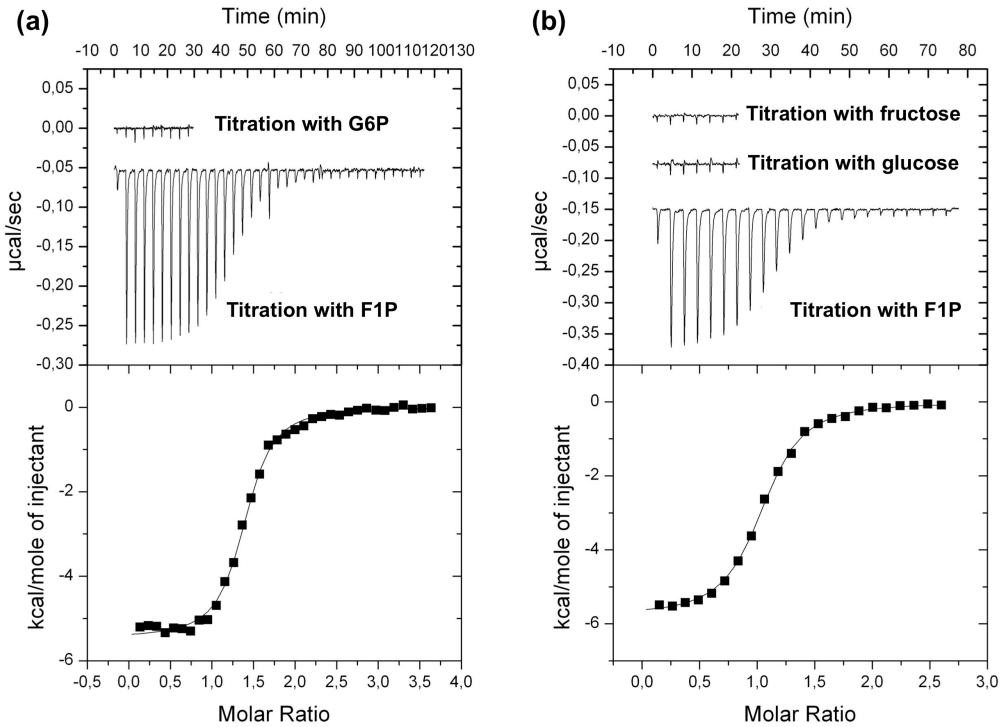

18 The upper panels plot raw data from representative ITC experiments, while the lower panels show the  
19 fitted curve of the titration with the bona fide effector Fructose 1-phosphate (F1P), integrated and  
20 corrected for dilution. F1P was added after each titration as positive control. The experiments covered  
21 concentrations of the effectors in the chamber ranging 300 nM to  $\geq 20 \mu\text{M}$ . Note that addition of G6P,  
22 fructose or glucose did not produce any signal on the titration, which means that the protein does not  
23 recognize these metabolites, at least at the concentrations tested.

24

25

26
